# Supplementary material
Source: PubMed Central journal article supplement (PMC2222982)

**A**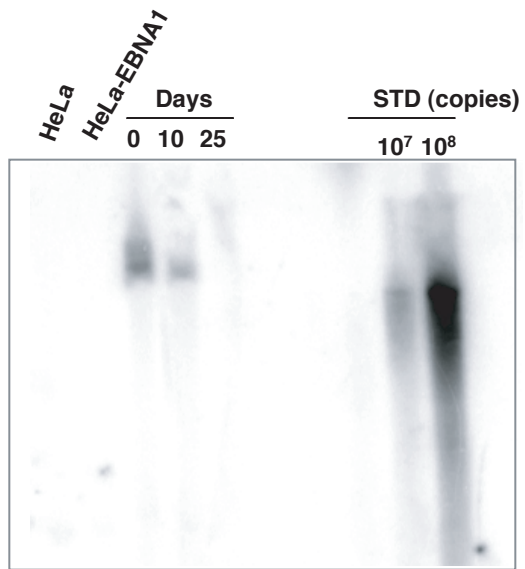**B**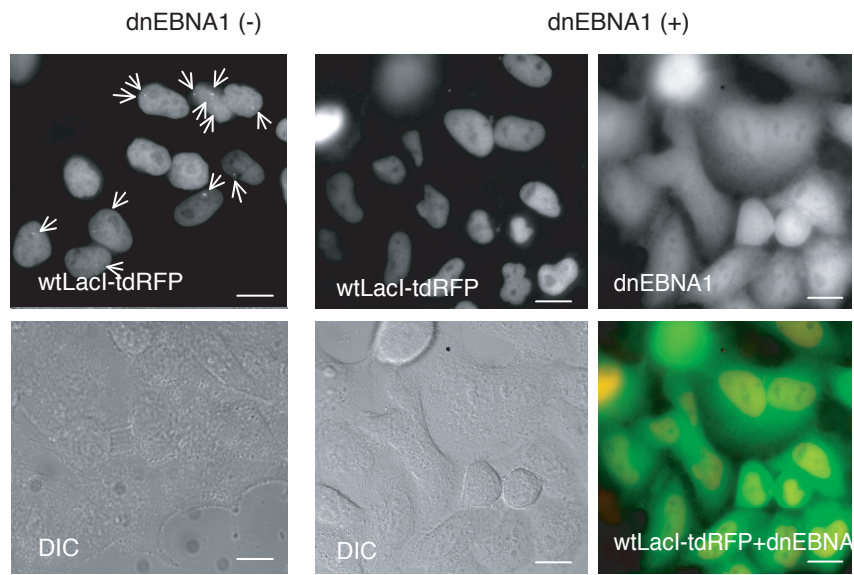**C**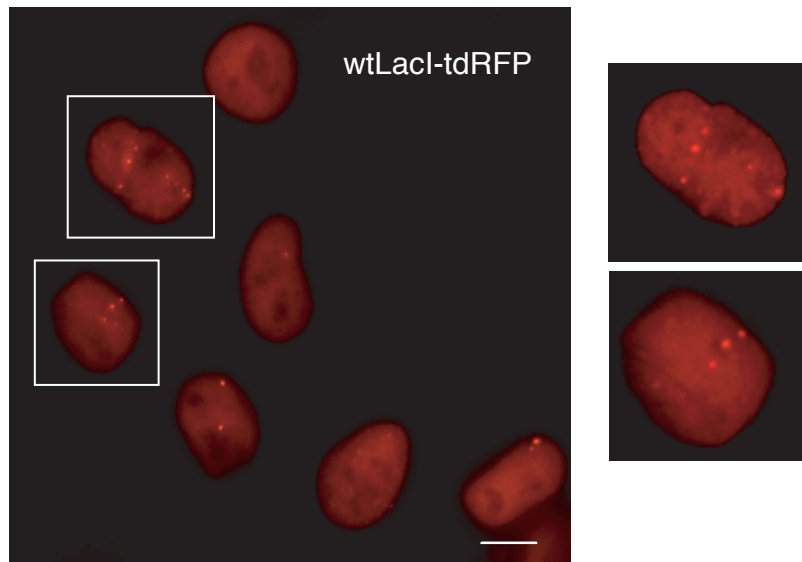Scale bars: 10  $\mu$ m

Supplement: 7601853s3.pdf [file 7601853s3.pdf]

### A. Efficiency of Duplication

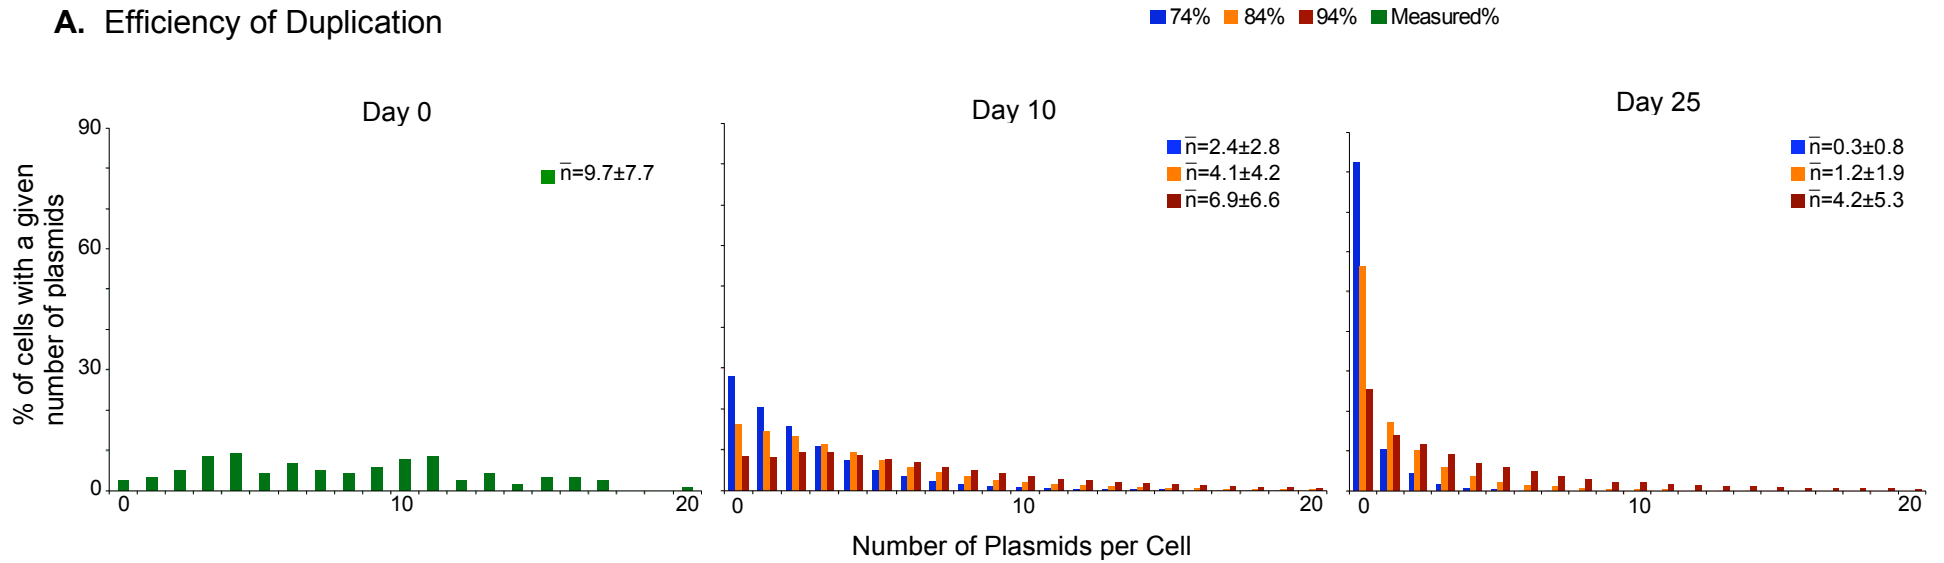

### B. Efficiency of Faithful Partitioning

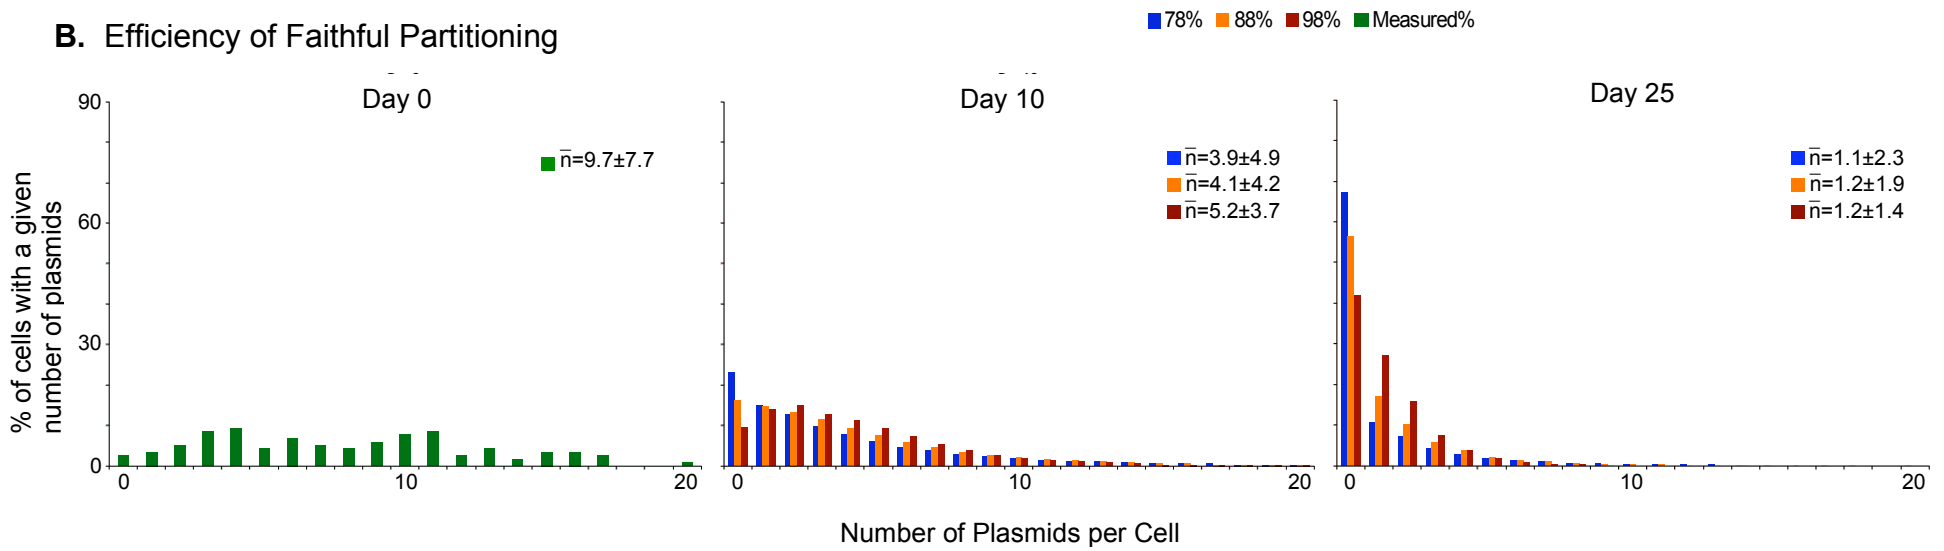

Supplement: 7601853s5.pdf [file 7601853s5.pdf]
